# Supplementary material for: Lebanon’s Native Oenological Saccharomyces cerevisiae Flora: Assessment of Different Aspects of Genetic Diversity and Evaluation of Winemaking Potential
Source: MDPI journal article supplement (doi:10.3390/jof7080678), 2021-08-23
Supplement: s1 [file s1]

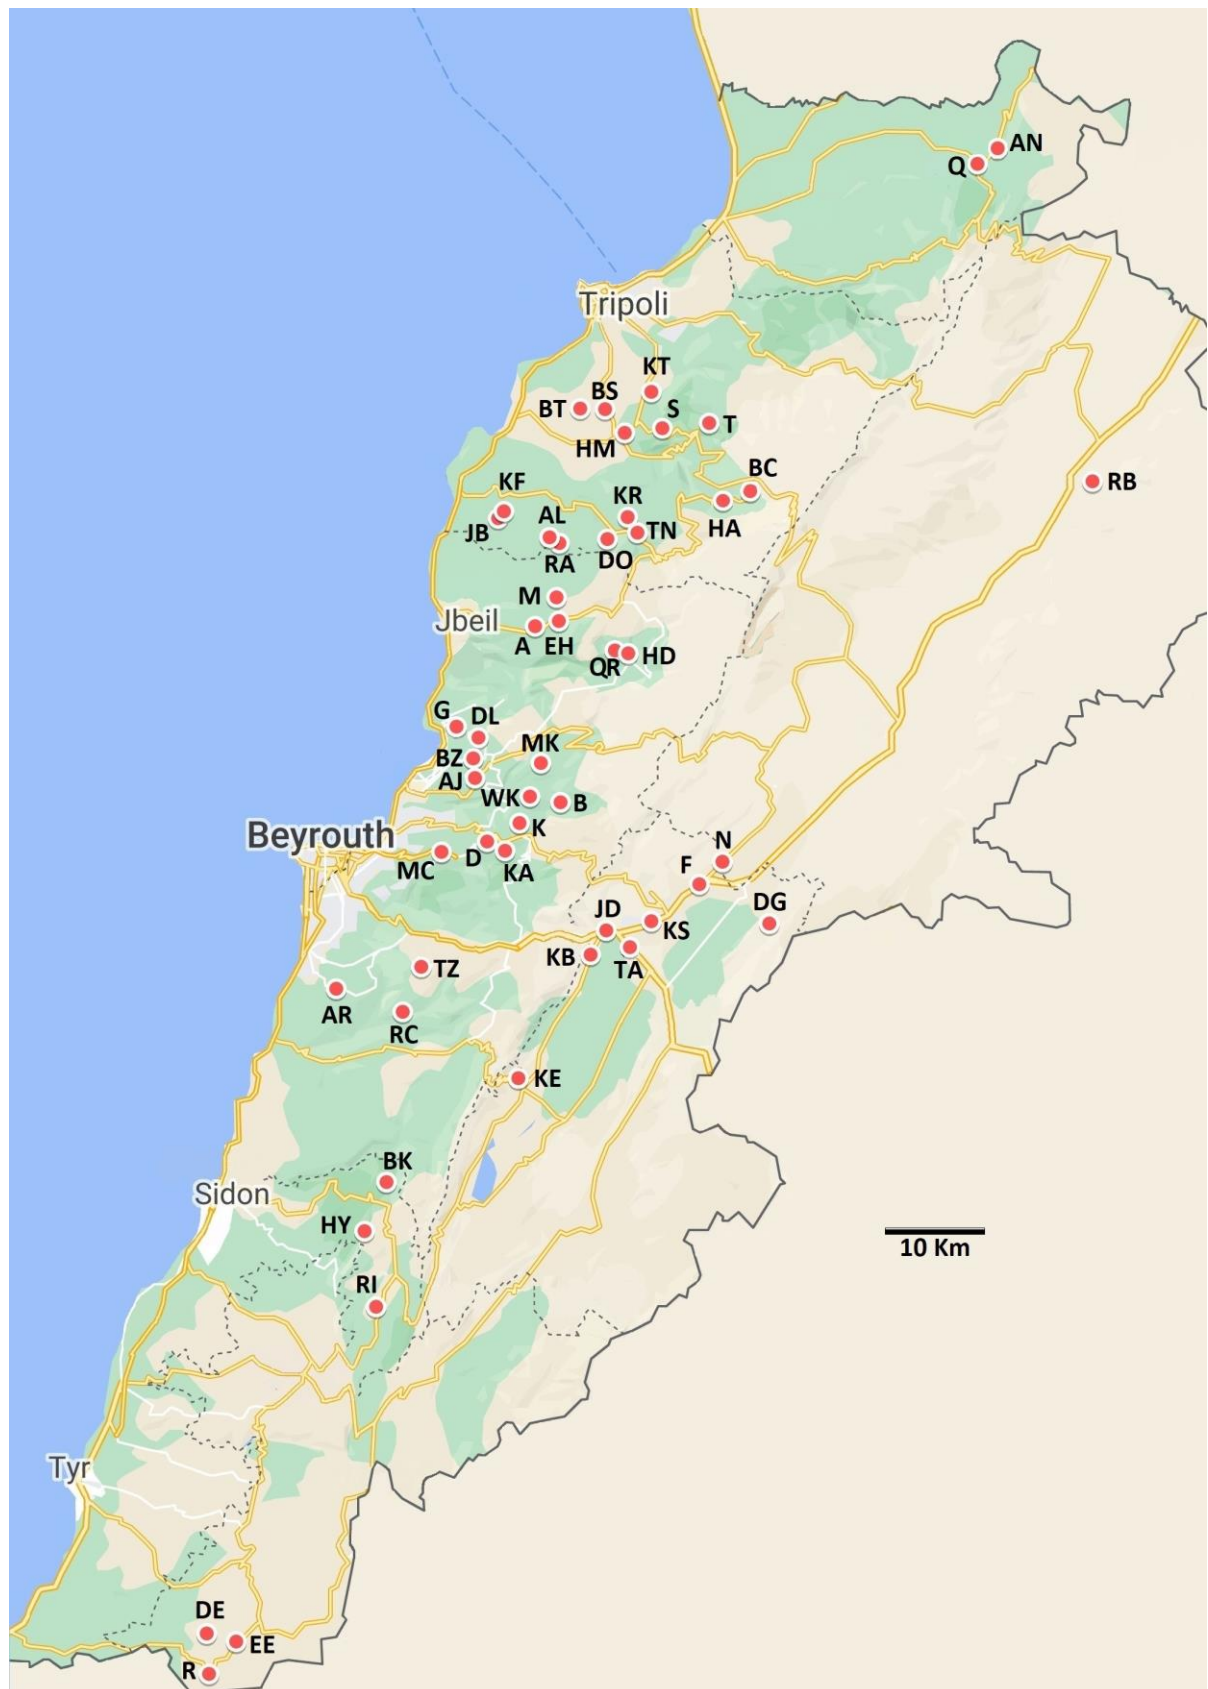

**Figure S1** Sampling spots over the Lebanese territory

Villages from where the samples were collected are indicated on the map by their initials



|           |          |    |                                                                                                                                     |          |    |                                                                                                                                      |  |  |
|-----------|----------|----|-------------------------------------------------------------------------------------------------------------------------------------|----------|----|--------------------------------------------------------------------------------------------------------------------------------------|--|--|
| Winery B  | <i>a</i> | 10 | <b>PB1</b> 50%<br><b>PB2</b> 30%<br>PB3 10%<br>PB4 10%                                                                              | <i>a</i> | 10 | <b>PB5</b> 30%<br><b>PB6</b> 20%<br>PB7 10%<br>PB8 10%<br>PB9 10%<br>PB10 10%<br>PB11 10%                                            |  |  |
| Winery HY | <i>a</i> | 10 | <u>PHY1</u> 10%<br><u>PHY2</u> 10%<br>PHY3 10%<br>PHY4 10%<br>PHY5 10%<br>PHY6 10%<br>PHY7 10%<br>PHY8 10%<br>PHY9 10%<br>PHY10 10% | <i>a</i> | 10 | <b>PHY11</b> 20%<br><u>PHY1</u> 10%<br><u>PHY2</u> 10%<br>PHY12 10%<br>PHY13 10%<br>PHY14 10%<br>PHY15 10%<br>PHY16 10%<br>PHY17 10% |  |  |
| Winery DG |          |    |                                                                                                                                     | <i>a</i> | 9  | <b>PDG1</b> 33%<br><b>PDG2</b> 22%<br>PDG3 11%<br>PDG4 11%<br>PDG5 11%<br>PDG6 11%                                                   |  |  |
| Winery D  |          |    |                                                                                                                                     | <i>a</i> | 9  | <b>PD1</b> 44%<br>PD2 11%<br>PD3 11%<br>PD4 11%<br>PD5 11%<br>PD6 11%                                                                |  |  |

1- **Nb.I** : Number of studied isolates

2- **ID.P** : Interdelta Profile (isolates are referenced by their profiles pattern and not their code)

3- % : Profile proportion in the sample when only one is considered per winery (3a), or in the population of all samples when several are included from the same winery (3b)

\* Profiles in bold are dominant in the populations of the studied wineries (from the same vat or from several vats of the same winery) while underlined profiles are stable for more than a year in the same winery

‡ Not taken into account for dominance or perenniality observation

**Table S2** Non-Lebanese strains included in Interdelta analysis

|                                | <b>Source/Reference</b> | <b>Place of Isolation</b>       |
|--------------------------------|-------------------------|---------------------------------|
| <b>Non-oenological strains</b> |                         |                                 |
| CLIB 409                       | Sugar cane              | Vietnam                         |
| CLIB 412                       | Sake                    | Japan                           |
| CLIB 413                       | Fermented rice          | China                           |
| CLIB 414                       | High-sugar food         | Japan                           |
| CLIB 415                       | Fermented rice          | Taiwan                          |
| <b>Oenological strains*</b>    |                         |                                 |
| Levuline BRG                   | UP3OY5                  | Bourgogne, France               |
| Levuline CER                   | Isolate of Davis 522    | University of California, Davis |
| Levuline CHP                   | CIVC8130                | Champagne, France               |
| Ceres C2C                      | -                       | Languedoc / INRA Narbonne       |
| Levuline C19                   | C19                     | INRA Colmar - INRA Montpellier  |
| EG8                            | EG8                     | Alsace / INRA Colmar            |
| Levuline FB                    | GLO 806                 | Champagne, France               |
| Levuline Killer                | GLO 522 K               | -                               |
| Montbazin 1                    | -                       | -                               |
| Levuline Primeur               | GLO 7447                | -                               |
| 522 Davis                      | 522 Davis               | University of California, Davis |
| <b>Other strains</b>           |                         |                                 |
| S288C                          | Plant                   | USA                             |
| CBS 1171NT                     | Beer                    | Netherlands                     |
| CBS 1907                       | -                       | -                               |

**Table S3** Origins of non-Lebanese strains according to country and production site for microsatellites analysis

| Oenological isolates |                |       | Number of strains |     |    |    |    |    |    |    |    |     |     |     |
|----------------------|----------------|-------|-------------------|-----|----|----|----|----|----|----|----|-----|-----|-----|
| Country              | Region/Village | Total | W1*               | W2  | W3 | W4 | W5 | W6 | W7 | W8 | W9 | W10 | W11 | W12 |
| Italy                |                | 18    | 18                |     |    |    |    |    |    |    |    |     |     |     |
| South Africa         | Cap            | 18    | 2                 | 2   | 3  | 2  | 4  | 5  |    |    |    |     |     |     |
| Spain                |                | 28    |                   |     |    |    |    |    |    |    |    |     |     |     |
|                      | Priorat        | 9     | 9                 |     |    |    |    |    |    |    |    |     |     |     |
|                      | Terra Alta     | 9     | 9                 |     |    |    |    |    |    |    |    |     |     |     |
|                      | Alicante       | 4     | 4                 |     |    |    |    |    |    |    |    |     |     |     |
|                      | Pontevedra     | 1     | 1                 |     |    |    |    |    |    |    |    |     |     |     |
|                      | Galicia        | 1     | 1                 |     |    |    |    |    |    |    |    |     |     |     |
|                      | Huelva         | 1     | 1                 |     |    |    |    |    |    |    |    |     |     |     |
|                      | Manzanares     | 1     | 1                 |     |    |    |    |    |    |    |    |     |     |     |
|                      | Valladolid     | 1     | 1                 |     |    |    |    |    |    |    |    |     |     |     |
|                      | Jumilla        | 1     | 1                 |     |    |    |    |    |    |    |    |     |     |     |
| USA                  |                | 15    | 1                 | 4   | 1  | 1  | 1  | 6  | 1  |    |    |     |     |     |
| France               |                | 158   |                   |     |    |    |    |    |    |    |    |     |     |     |
|                      | Alsace         | 90    | 14                | 14  | 5  | 9  | 2  | 14 | 12 | 7  | 13 |     |     |     |
|                      | Champagne      | 2     | 2                 |     |    |    |    |    |    |    |    |     |     |     |
|                      | Cognac         | 7     | 2                 | 1   | 1  | 1  | 1  | 1  |    |    |    |     |     |     |
|                      | Montpellier    | 19    | 19                |     |    |    |    |    |    |    |    |     |     |     |
|                      | Nantes         | 18    | 1                 | 2   | 1  | 2  | 1  | 1  | 2  | 1  | 2  | 1   | 2   | 2   |
|                      | Côtes du Rhone | 22    | 14**              | 4** | 1  | 1  | 1  | 1  |    |    |    |     |     |     |

\* Winery 1, 2 etc...

\*\* 2 years

**Table S4** Strains used in lab-scale fermentations

| Strain | Winery | Wine type | Isolation year |
|--------|--------|-----------|----------------|
| S1     | BCa    | White     | III            |
| S2     | BCb    | White     | III            |
| S3     | BCc    | White     | III            |
| S4     | DL     | White     | III            |
| S5     | EH     | White     | III            |
| S6     | HAa    | White     | III            |
| S7     | JDc    | White     | I              |
| S8     | JDa    | Rosé      | III            |
| S9     | JDa    | Red       | III            |
| S10    | Ka     | Sweet     | III            |
| S11    | Ka     | Sweet     | III            |
| S12    | Kb     | White     | III            |
| S13    | KE     | White     | III            |
| S14    | MC     | Red       | III            |
| S15    | MC     | Sweet     | I              |
| S16    | MC     | Red       | I              |
| S17    | R      | Rosé      | III            |
| S18    | Ta     | Sweet     | III            |
| S19    | Ta     | Sweet     | III            |
| S20    | WKa    | Red       | I              |
| S21    | WKb    | Red       | III            |

**Table S5** Technological characteristics of the 22 studied *S.cerevisiae* strains and basic features of experimental wines.

| Strain               | Glycerol           |       | AD*     |       | RS**    |       | T.A*** |       | R12‡                 |        | R14‡    |       | R16‡                |       | H <sub>2</sub> S† |
|----------------------|--------------------|-------|---------|-------|---------|-------|--------|-------|----------------------|--------|---------|-------|---------------------|-------|-------------------|
| <b>S1</b>            | 4.64               | ±0.01 | 9.23    | ±0.06 | 35.65   | ±2.45 | 8.87   | ±0.12 | ND                   |        | ND      |       | ND                  |       | L                 |
| <b>S2</b>            | 6.34 <sup>ab</sup> | ±0.57 | 11.08   | ±0.14 | 2.25    | ±0.85 | 8.62   | ±0.13 | 72.92 <sup>bc</sup>  | ±10.14 | 62.50   | ±7.30 | 0.00 <sup>a</sup>   | ±0.00 | L                 |
| <b>S3</b>            | 6.64 <sup>ab</sup> | ±0.14 | 10.83   | ±0.10 | 2.25    | ±0.55 | 8.75   | ±0.12 | 21.78 <sup>a</sup>   | ±5.61  | 20.00   | ±2.37 | 17.78 <sup>ab</sup> | ±1.42 | L                 |
| <b>S4</b>            | 6.73 <sup>ab</sup> | ±0.09 | 10.86   | ±0.01 | 1.95    | ±0.25 | 8.98   | ±0.09 | 64.19 <sup>bc</sup>  | ±8.77  | 54.74   | ±7.28 | 14.32 <sup>ab</sup> | ±5.00 | L                 |
| <b>S5</b>            | 6.62               | ±0.35 | 10.92   | ±0.06 | 2.40    | ±1.00 | 8.75   | ±0.24 | 58.33                | ±9.13  | 53.33   | ±5.62 | 51.67               | ±8.40 | M                 |
| <b>S6</b>            | 6.30               | ±0.14 | 10.84   | ±0.18 | 1.20    | ±0.60 | 7.87   | ±0.00 | 29.74                | ±4.36  | 20.43   | ±2.64 | 0.00                | ±0.00 | M                 |
| <b>S7</b>            | 6.58               | ±0.01 | 10.99   | ±0.04 | 2.15    | ±0.45 | 8.62   | ±0.00 | 75.00                | ±8.94  | 43.75   | ±2.24 | 0.00                | ±0.00 | M                 |
| <b>S8</b>            | 6.87               | ±0.20 | 11.06   | ±0.10 | 1.10    | ±0.10 | 8.69   | ±0.43 | 63.64                | ±3.28  | 42.42   | ±5.29 | 30.30               | ±2.20 | H                 |
| <b>S9</b>            | 6.73               | ±0.24 | 10.91   | ±0.06 | 2.90    | ±1.00 | 8.75   | ±0.26 | 65.00                | ±7.44  | 65.00   | ±6.88 | 37.50               | ±4.35 | M                 |
| <b>S10</b>           | 7.83               | ±0.20 | 10.79   | ±0.10 | 2.10    | ±0.30 | 9.56   | ±0.19 | 36.73                | ±6.52  | 36.36   | ±3.33 | 27.27               | ±4.13 | H                 |
| <b>S11</b>           | 4.53               | ±0.24 | 7.86    | ±0.16 | 53.25   | ±1.05 | 8.31   | ±0.31 | ND                   |        | ND      |       | ND                  |       | L                 |
| <b>S12</b>           | 6.47 <sup>ab</sup> | ±0.42 | 10.96   | ±0.09 | 2.65    | ±1.35 | 8.44   | ±0.18 | 71.88 <sup>bc</sup>  | ±9.47  | 34.38   | ±5.12 | 32.29 <sup>bc</sup> | ±4.56 | L                 |
| <b>S13</b>           | 6.34 <sup>ab</sup> | ±0.18 | 11.00   | ±0.11 | 2.54    | ±0.16 | 9.01   | ±0.21 | 32.33 <sup>ab</sup>  | ±9.52  | 15.86   | ±1.92 | 12.51 <sup>ab</sup> | ±1.49 | L                 |
| <b>S14</b>           | 7.56 <sup>b</sup>  | ±0.42 | 10.91   | ±0.12 | 1.70    | ±0.10 | 9.12   | ±0.12 | 9.07 <sup>a</sup>    | ±3.46  | 6.67    | ±2.04 | 6.00 <sup>a</sup>   | ±2.11 | L                 |
| <b>S15</b>           | 7.16 <sup>b</sup>  | ±0.04 | 10.97   | ±0.15 | 1.65    | ±0.75 | 8.75   | ±0.13 | 76.71 <sup>c</sup>   | ±8.23  | 75.34   | ±5.67 | 72.60 <sup>d</sup>  | ±6.97 | L                 |
| <b>S16</b>           | 6.62 <sup>ab</sup> | ±0.25 | 10.87   | ±0.11 | 2.10    | ±0.20 | 9.06   | ±0.15 | 34.88 <sup>abc</sup> | ±4.71  | 16.28   | ±3.46 | 0.00 <sup>a</sup>   | ±0.00 | L                 |
| <b>S17</b>           | 4.75 <sup>a</sup>  | ±0.77 | 10.91   | ±0.14 | 4.65    | ±0.65 | 8.56   | ±0.44 | 40.00 <sup>abc</sup> | ±8.23  | 40.13   | ±6.31 | 32.00 <sup>bc</sup> | ±6.34 | L                 |
| <b>S18</b>           | 5.67 <sup>ab</sup> | ±0.05 | 11.17   | ±0.14 | 2.35    | ±0.55 | 8.94   | ±0.19 | 73.75 <sup>bc</sup>  | ±7.56  | 50.00   | ±5.45 | 4.63 <sup>a</sup>   | ±1.85 | L                 |
| <b>S19</b>           | 5.87               | ±0.10 | 11.04   | ±0.17 | 2.20    | ±0.20 | 9.12   | ±0.24 | 67.14                | ±6.82  | 55.71   | ±7.26 | 0.00                | ±0.00 | M                 |
| <b>S20</b>           | 7.23 <sup>b</sup>  | ±0.18 | 11.08   | ±0.15 | 2.40    | ±0.40 | 8.28   | ±0.40 | 72.04 <sup>bc</sup>  | ±5.76  | 67.59   | ±7.02 | 51.60 <sup>c</sup>  | ±4.38 | L                 |
| <b>S21</b>           | 7.55               | ±0.59 | 10.97   | ±0.15 | 1.55    | ±0.55 | 8.50   | ±0.25 | 27.42                | ±5.96  | 17.74   | ±4.01 | 0.00                | ±0.00 | M                 |
| <b>522D</b>          | 5.72 <sup>ab</sup> | ±0.30 | 10.67   | ±0.18 | 9.00    | ±2.30 | 8.94   | ±0.81 | 41.18 <sup>abc</sup> | ±5.1   | 23.53   | ±2.93 | 0.00 <sup>a</sup>   | ±0.00 | L                 |
| <b>Pr &gt; F</b>     | <0.0001            |       | <0.0001 |       | <0.0001 |       | 0.157  |       | <0.0001              |        | <0.0001 |       | <0.0001             |       |                   |
| <b>Significant §</b> | Yes                |       | Yes     |       | Yes     |       | No     |       | Yes                  |        | Yes     |       | Yes                 |       |                   |

Data are means ± standard deviation of two independent experiments

§ Given a statistical significance level of 5% and the p-value of the F statistic in one way ANOVA analysis

For the parameters and strains retained for PCA analysis, different superscript letters along a column indicate significant differences between strains according to the Tukey test.

\* Alcohol Degree in % (v/v)

\*\* Residual sugars in g/l

\*\*\* Total Acidity in g/l

‡ Resistance to 12 (R12), 14(R14) and 16(R16) % ethanol

† H<sub>2</sub>S production : L, M, H stand respectively for low, medium and high productions of H<sub>2</sub>S (see Materials and Methods)

ND Not Determined

**Table S6** Aromatic compounds (mg/l) in experimental wines produced by the 22 studied *S.cerevisiae* strains during lab-scale fermentations.

| Strain        | n-Propanol |       | Isobutanol |       | Isoamyl Alcohol |        | Sum of Higher Alcohols |        | Ethyl Acetate         |       | Acetaldehyde        |        |
|---------------|------------|-------|------------|-------|-----------------|--------|------------------------|--------|-----------------------|-------|---------------------|--------|
| S1            | 46.32      | ±1.46 | 54.67      | ±1.68 | 174.65          | ±8.94  | 275.64                 | ±12.08 | 43.38                 | ±0.33 | 38.17               | ±1.97  |
| S2            | 34.35      | ±2.26 | 52.23      | ±3.32 | 162.68          | ±18.67 | 249.26 <sup>bc</sup>   | ±24.24 | 29.51 <sup>abcd</sup> | ±2.08 | 36.37 <sup>a</sup>  | ±1.49  |
| S3            | 34.66      | ±2.71 | 58.04      | ±1.47 | 113.29          | ±6.38  | 205.99 <sup>ab</sup>   | ±10.57 | 30.73 <sup>abcd</sup> | ±0.57 | 37.39 <sup>a</sup>  | ±3.23  |
| S4            | 39.92      | ±0.51 | 24.16      | ±0.46 | 149.98          | ±11.47 | 214.06 <sup>abc</sup>  | ±10.50 | 20.55 <sup>ab</sup>   | ±1.38 | 115.24 <sup>c</sup> | ±2.72  |
| S5            | 44.45      | ±5.17 | 46.59      | ±1.71 | 152.12          | ±11.48 | 243.17                 | ±4.60  | 31.65                 | ±2.24 | 52.74               | ±3.73  |
| S6            | 28.10      | ±1.44 | 51.78      | ±1.77 | 120.54          | ±3.68  | 200.42                 | ±0.47  | 27.98                 | ±2.48 | 39.20               | ±1.00  |
| S7            | 40.80      | ±3.19 | 14.39      | ±1.64 | 124.69          | ±14.85 | 179.88                 | ±10.02 | 22.93                 | ±2.16 | 149.12              | ±5.40  |
| S8            | 39.59      | ±1.44 | 48.44      | ±2.02 | 155.24          | ±1.22  | 243.28                 | ±2.24  | 34.35                 | ±2.66 | 53.45               | ±1.79  |
| S9            | 52.91      | ±4.40 | 45.56      | ±3.95 | 124.63          | ±4.79  | 223.10                 | ±3.56  | 21.59                 | ±1.73 | 65.08               | ±4.66  |
| S10           | 46.43      | ±0.96 | 75.42      | ±2.60 | 141.25          | ±15.27 | 263.10                 | ±11.72 | 24.95                 | ±3.92 | 88.03               | ±4.41  |
| S11           | 36.60      | ±0.78 | 44.68      | ±0.42 | 131.99          | ±6.17  | 213.26                 | ±6.53  | 27.72                 | ±1.58 | 34.92               | ±4.80  |
| S12           | 46.59      | ±5.50 | 49.04      | ±6.84 | 148.18          | ±14.70 | 243.81 <sup>abc</sup>  | ±27.03 | 34.28 <sup>cde</sup>  | ±4.27 | 38.46 <sup>a</sup>  | ±0.46  |
| S13           | 32.67      | ±0.50 | 27.29      | ±3.00 | 192.57          | ±16.91 | 252.53 <sup>bc</sup>   | ±19.41 | 20.31 <sup>ab</sup>   | ±1.02 | 145.08 <sup>c</sup> | ±15.29 |
| S14           | 38.09      | ±1.18 | 43.09      | ±2.70 | 130.49          | ±0.51  | 211.67 <sup>abc</sup>  | ±3.38  | 20.61 <sup>ab</sup>   | ±0.18 | 122.52 <sup>c</sup> | ±4.60  |
| S15           | 63.84      | ±3.52 | 90.61      | ±3.58 | 146.82          | ±4.17  | 301.26 <sup>c</sup>    | ±11.26 | 45.24 <sup>e</sup>    | ±1.77 | 41.14 <sup>ab</sup> | ±2.99  |
| S16           | 27.21      | ±3.45 | 53.60      | ±4.08 | 101.92          | ±4.36  | 182.73 <sup>ab</sup>   | ±11.89 | 40.11 <sup>de</sup>   | ±3.01 | 127.43 <sup>c</sup> | ±4.24  |
| S17           | 38.00      | ±3.13 | 29.08      | ±2.55 | 136.71          | ±13.88 | 203.79 <sup>ab</sup>   | ±14.46 | 24.05 <sup>abc</sup>  | ±2.29 | 47.25 <sup>ab</sup> | ±4.51  |
| S18           | 45.36      | ±4.13 | 43.47      | ±6.35 | 126.47          | ±12.59 | 215.30 <sup>abc</sup>  | ±23.06 | 31.17 <sup>bcd</sup>  | ±3.13 | 61.45 <sup>ab</sup> | ±4.94  |
| S19           | 29.37      | ±2.29 | 42.58      | ±2.44 | 146.59          | ±5.06  | 218.54                 | ±0.32  | 28.17                 | ±1.01 | 36.27               | ±0.54  |
| S20           | 39.16      | ±1.20 | 35.78      | ±0.96 | 125.09          | ±5.23  | 200.03 <sup>ab</sup>   | ±4.99  | 19.03 <sup>a</sup>    | ±0.71 | 63.83 <sup>ab</sup> | ±6.20  |
| S21           | 28.55      | ±1.92 | 40.84      | ±3.31 | 163.22          | ±8.07  | 232.61                 | ±13.30 | 29.27                 | ±0.64 | 40.34               | ±1.96  |
| 522D          | 28.28      | ±1.75 | 25.22      | ±1.81 | 101.81          | ±14.78 | 155.30 <sup>a</sup>    | ±18.33 | 23.34 <sup>abc</sup>  | ±1.48 | 74.20 <sup>b</sup>  | ±9.30  |
| Pr > F        | <0.0001    |       | <0.0001    |       | 0.000           |        | <0.0001                |        | <0.0001               |       | <0.0001             |        |
| Significant § | Yes        |       | Yes        |       | Yes             |        | Yes                    |        | Yes                   |       | Yes                 |        |

Data are means ± standard deviation of two independent experiments

§ Given a statistical significance level of 5% and the p-value of the F statistic in one way ANOVA analysis

For the parameters and strains retained for PCA analysis, different superscript letters along a column indicate significant differences between strains according to the Tukey test.
